# Supplementary material
Source: ML conference proceedings conference paper supplement (https://proceedings.neurips.cc/paper_files/paper/2022/hash/3173c427cb4ed2d5eaab029c17f221ae-Abstract.html)
Supplement: Supplementary file 1 [file 3173c427cb4ed2d5eaab029c17f221ae-Supplemental-Conference.pdf]

# Systematic improvement of neural network quantum states using Lanczos(Supplementary Material)

Hongwei Chen<sup>1,2,3</sup> Douglas Hendry<sup>1</sup> Phillip Weinberg<sup>1</sup> Adrian E. Feiguin<sup>1</sup>

<sup>1</sup>Department of Physics, Northeastern University, Boston, USA

<sup>2</sup>Stanford Institute for Materials and Energy Sciences, Stanford University, Stanford, USA

<sup>3</sup>Linac Coherent Light Source, SLAC National Accelerator Laboratory, Menlo Park, USA

{chen.hongw, hendry.d, p.weinberg, a.feiguin}@northeastern.edu

## A Accuracy of ground state energy

To show the energy improvements from restoring different kinds of symmetry, we tried several variational wave functions  $\psi_s$ ,  $\psi_K$ , and  $\psi_{KL}$ . Their variational energies are shown in the table 1.

Table 1: The ground state energy per site for the 2D Heisenberg model( $J_2 = 0$ ) on a  $6 \times 6$ ,  $8 \times 8$ , and  $10 \times 10$  square lattice obtained from the RBM wave function with different kinds of symmetries restored.

| Lattice Size                                    | $6 \times 6$ | $8 \times 8$ | $10 \times 10$ |
|-------------------------------------------------|--------------|--------------|----------------|
| $\psi_s$ : Spin flip symmetry(SFS)              | -0.67762     | -0.67154     | -0.66737       |
| $\psi_K$ : SFS + Translational symmetry(TS)     | -0.678844    | -0.673425    | -0.671288      |
| $\psi_{KL}$ : SFS + TS + Lattice point symmetry | -0.678868    | -0.673482    | -0.671519      |

## B Derivation of the Lanczos recursion

Using  $\psi_0$  and  $\psi_1$  as new basis, the Hamiltonian will be a  $2 \times 2$  symmetric matrix.

$$\begin{pmatrix} \langle H \rangle & (\langle H^2 \rangle - \langle H \rangle^2)^{1/2} \\ (\langle H^2 \rangle - \langle H \rangle^2)^{1/2} & \frac{\langle H^3 \rangle - 2\langle H^2 \rangle \langle H \rangle + \langle H \rangle^3}{\langle H^2 \rangle - \langle H \rangle^2} \end{pmatrix} \quad (1)$$

Considering the most generic  $2 \times 2$  symmetric matrix  $\begin{pmatrix} a & c \\ c & b \end{pmatrix}$ , the two eigenvalues of this matrix can be written as :

$$\varepsilon_1 = \frac{1}{2}[a + b - ((b - a)^2 + 4c^2)^{1/2}] \quad \text{and} \quad \varepsilon_2 = \frac{1}{2}[a + b + ((b - a)^2 + 4c^2)^{1/2}]. \quad (2)$$

Plugging the expressions for  $a, b, c$ , we obtain Eq.(14):

$$\varepsilon_1 = \frac{1}{2} \left( \langle H \rangle + \frac{\langle H^3 \rangle - 2\langle H^2 \rangle \langle H \rangle + \langle H \rangle^3}{\langle H^2 \rangle - \langle H \rangle^2} - \left( \left( \frac{\langle H^3 \rangle - 3\langle H^2 \rangle \langle H \rangle + 2\langle H \rangle^3}{\langle H^2 \rangle - \langle H \rangle^2} \right)^2 + 4(\langle H^2 \rangle - \langle H \rangle^2) \right)^{1/2} \right) \quad (3)$$

$$= \langle H \rangle + \frac{\langle H^3 \rangle - 3\langle H^2 \rangle \langle H \rangle + 2\langle H \rangle^3}{2(\langle H^2 \rangle - \langle H \rangle^2)} - (\langle H^2 \rangle - \langle H \rangle^2)^{1/2} \left( \left( \frac{\langle H^3 \rangle - 3\langle H^2 \rangle \langle H \rangle + 2\langle H \rangle^3}{2(\langle H^2 \rangle - \langle H \rangle^2)^{3/2}} \right)^2 + 1 \right)^{1/2} \quad (4)$$

$$= \langle H \rangle + (\langle H^2 \rangle - \langle H \rangle^2)^{1/2} \left[ \frac{\langle H^3 \rangle - 3\langle H^2 \rangle \langle H \rangle + 2\langle H \rangle^3}{2(\langle H^2 \rangle - \langle H \rangle^2)^{3/2}} - \left( \frac{\langle H^3 \rangle - 3\langle H^2 \rangle \langle H \rangle + 2\langle H \rangle^3}{2(\langle H^2 \rangle - \langle H \rangle^2)^{3/2}} \right)^2 + 1 \right]^{1/2}. \quad (5)$$

The corresponding eigenvector is  $\begin{pmatrix} \psi_0 \\ \alpha \psi_1 \end{pmatrix}$ , with

$$\alpha = \frac{b - a - \sqrt{(b - a)^2 + 4c^2}}{2c} = \left[ \frac{\langle H^3 \rangle - 3\langle H^2 \rangle \langle H \rangle + 2\langle H \rangle^3}{2(\langle H^2 \rangle - \langle H \rangle^2)^{3/2}} - \left( \frac{\langle H^3 \rangle - 3\langle H^2 \rangle \langle H \rangle + 2\langle H \rangle^3}{2(\langle H^2 \rangle - \langle H \rangle^2)^{3/2}} \right)^2 + 1 \right]^{1/2}, \quad (6)$$

which is the explicit form of  $\alpha$  in Eq.(18). Hence, the new improved eigenvector becomes

$$\tilde{\psi}_0 = \psi_0 + \alpha \psi_1. \quad (7)$$

Notice that  $\tilde{\psi}_0$  is not normalized. The normalized form of  $\tilde{\psi}_0$  is given by Eq.(15):

$$\tilde{\psi}_0 = \frac{1}{(1 + \alpha^2)^{1/2}} \psi_0 + \frac{\alpha}{(1 + \alpha^2)^{1/2}} \psi_1, \quad (8)$$
